# Supplementary material
Source: Springer Nature journal article supplement (https://www.springermedizin.de/resource/supplementary/12933_2010_272_MOESM2_ESM.pdf/9539988)

Physician recruitment

Patient observation, 2 year FU

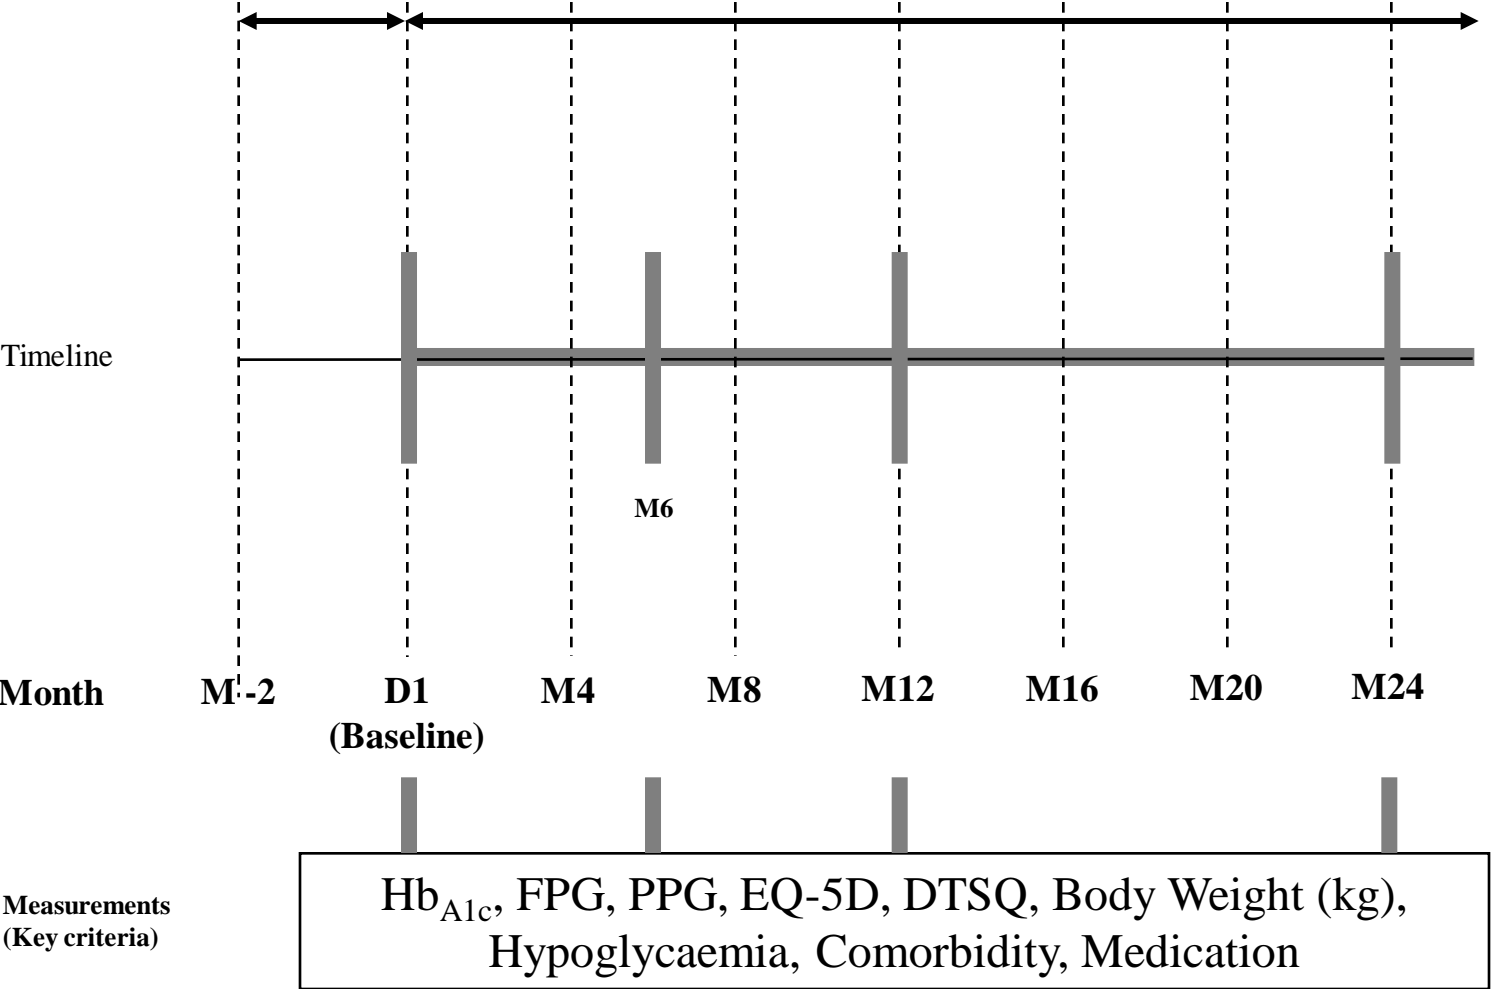

Supplement: MOESM2 [file 9539988]
